# Supplementary material for: Effect of high-dose plerixafor on CD34+ cell mobilization in healthy stem cell donors: results of a randomized crossover trial
Source: PubMed Central journal article supplement — Haematologica. 2016 Oct 19;102(3):600–9. doi: 10.3324/haematol.2016.147132 (PMC5394957; doi:10.3324/haematol.2016.147132), 2017-03
Supplement: 2016.147132.PANTIN_SUPPL.pdf [file 2016.147132.PANTIN_SUPPL.pdf]

## Effect of high-dose plerixafor on CD34<sup>+</sup> cell mobilization in healthy stem cell donors: results of a randomized crossover trial

Jeremy Pantin,<sup>1\*</sup> Enkhtsetseg Purev,<sup>2\*</sup> Xin Tian,<sup>3</sup> Lisa Cook,<sup>2</sup> Theresa Donohue-Jerussi,<sup>2</sup> Elena Cho,<sup>2</sup> Robert Reger,<sup>2</sup> Matthew Hsieh,<sup>2</sup> Hanh Khuu,<sup>4</sup> Gary Calandra,<sup>5</sup> Nancy L. Geller<sup>3</sup> and Richard W. Childs<sup>2</sup>

<sup>1</sup>Hematology and Oncology, Department of Medicine, Augusta University, GA; <sup>2</sup>Hematology Branch, National Heart, Lung, and Blood Institute, National Institutes of Health, Bethesda, MD; <sup>3</sup>Office of Biostatistics Research, National Heart, Lung, and Blood Institute, National Institutes of Health, Bethesda, MD; <sup>4</sup>Department of Transfusion Medicine, Clinical Research Center, National Institutes of Health, Bethesda, MD and <sup>5</sup>Sanofi Oncology, Cambridge, MA, USA

*\*JP and EP contributed equally to this work.*

©2017 Ferrata Storti Foundation. This is an open-access paper. doi:10.3324/haematol.2016.147132

Received: April 7, 2016.

Accepted: October 10, 2016.

Pre-published: October 20, 2016.

Correspondence: childsr@nih.gov

---

**Supplemental materials:**

**Effect of High-Dose Plerixafor on CD34+ Cells Mobilization in Healthy Stem-Cell Donors:  
Results of a Randomized Crossover trial**

<sup>1\*</sup>Jeremy Pantin, <sup>2\*</sup>Enkhtsetseg Purev, <sup>3</sup>Xin Tian, <sup>2</sup>Lisa Cook, <sup>2</sup>Theresa Donohue-Jerussi, <sup>2</sup>Elena Cho, <sup>2</sup>Robert Reger, <sup>2</sup>Matthew Hsieh, <sup>4</sup>Hanh Khuu, <sup>5</sup>Gary Calandra, <sup>3</sup>Nancy L. Geller, <sup>2</sup>Richard W. Childs.

<sup>1</sup>Hematology and Oncology, Department of Medicine, Augusta University, Augusta, GA, USA

<sup>2</sup>Hematology Branch, National Heart, Lung, and Blood Institute, National Institutes of Health, Bethesda, MD, USA

<sup>3</sup>Office of Biostatistics Research, National Heart, Lung, and Blood Institute, National Institutes of Health, Bethesda, MD, USA

<sup>4</sup>Department of Transfusion Medicine, Clinical Research Center, National Institutes of Health, Bethesda, MD, USA

<sup>5</sup>Sanofi Oncology, Cambridge, MA, USA

\* JP and EP contributed equally to this work.

**Corresponding Author**

Richard W. Childs, MD

Hematology Branch; National Heart, Lung, and Blood Institute; National Institutes of Health

10 Center Drive, Bldg 10 CRC 3-5330

Bethesda, MD, 20892, USA

Ph. (301) 451-7128

[childs\\_r@nih.gov](mailto:childs_r@nih.gov)

**Supplemental Table S1.** Peripheral Blood CD34+ cells, CD34+ cell AUC and time to peak CD34+ count.

|                                      | Plerixafor<br>240 µg/kg<br>Median (range) | Plerixafor<br>480 µg/kg<br>Median (range) | Paired<br>Difference<br>median(IQR) | <i>P</i> value |
|--------------------------------------|-------------------------------------------|-------------------------------------------|-------------------------------------|----------------|
| Peak CD34+ (cells/µL)                | 25 (13–58)                                | 31.5 (17–64)                              | 4.5 (2.5–6.3)                       | 0.0009         |
| CD34+ cell AUC 0-24 hrs (h cells/µL) | 411 (229–991)                             | 543 (275–1191)                            | 109 (53–184)                        | <0.0001        |
| CD34+ cells/µL at 24 hr              | 9 (2-33)                                  | 15.5 (7–52)                               | 6 (4–10)                            | <0.0001        |
| Time to CD34+ peak (hrs)             | 8 (6–12)                                  | 10 (6–18)                                 | 2 (0–4)                             | 0.011          |

*Note:* Data are median (range), or median (IQR) for the paired difference.

**Supplemental Table S2. Peak CD34+ cell counts achieved and their ratios.**

| patient no. | peak CD34+<br>after 240 µg/kg<br>Plerixafor<br>(cells/µL) | peak CD34+<br>after 480 µg/kg<br>Plerixafor<br>(cells/µL) | ratio of peak CD34+ for<br>480 µg/kg vs. 240 µg/kg<br>Plerixafor |
|-------------|-----------------------------------------------------------|-----------------------------------------------------------|------------------------------------------------------------------|
| 1           | 13                                                        | 18                                                        | 1.38                                                             |
| 2           | 14                                                        | 17                                                        | 1.21                                                             |
| 3           | 18                                                        | 31                                                        | 1.72                                                             |
| 4           | 19                                                        | 25                                                        | 1.32                                                             |
| 5           | 19                                                        | 19                                                        | 1.00                                                             |
| 6           | 20                                                        | 26                                                        | 1.30                                                             |
| 7           | 20                                                        | 21                                                        | 1.05                                                             |
| 8           | 21                                                        | 24                                                        | 1.14                                                             |
| 9           | 23                                                        | 27                                                        | 1.17                                                             |
| 10          | 24                                                        | 43                                                        | 1.79                                                             |
| 11          | 26                                                        | 32                                                        | 1.23                                                             |
| 12          | 27                                                        | 24                                                        | 0.89                                                             |
| 13          | 29                                                        | 36                                                        | 1.24                                                             |
| 14          | 32                                                        | 40                                                        | 1.25                                                             |
| 15          | 34                                                        | 38                                                        | 1.12                                                             |
| 16          | 36                                                        | 33                                                        | 0.92                                                             |
| 17          | 38                                                        | 41                                                        | 1.08                                                             |
| 18          | 45                                                        | 52                                                        | 1.16                                                             |
| 19          | 47                                                        | 44                                                        | 0.94                                                             |
| 20          | 58                                                        | 64                                                        | 1.10                                                             |

**Supplemental Figure S1.** Circulating CD34+ cell AUC (h cells/ $\mu$ L) and peak circulating CD34+ cells/ $\mu$ L (\*) in the 7 subjects who mobilized poorly following the 240  $\mu$ g/kg dose of plerixafor (defined as those who had a peak circulating CD34+ counts  $\leq$  20 cells/ $\mu$ L with the conventional dose of plerixafor).

**Supplemental Figure S2.** Erythroid and granulocyte-macrophage CFU colony forming units from peripheral blood samples. Mean number of colonies per  $10^5$ /mL mononuclear cells prior to and 6 hours after the administration of 240 and 480  $\mu$ g/kg of plerixafor. Error bars indicate the SEM. ns: not significant, \*\*\*: $P < 0.0001$ .

Peripheral blood mononuclear cells were isolated using standard Ficoll-hypaque density gradient separation and inoculated at  $1 \times 10^5$  cells/mL in three different methylcellulose culture media (MethoCult H4230; Stem Cell Technologies, Vancouver, Canada), supplemented with 5  $\mu$ g/mL of recombinant human (rHu) erythropoietin (Epo; Amgen, Thousand Oaks, CA, USA), 10 ng/mL rHu granulocyte-macrophage colony stimulating factor (GM-CSF; Sandoz, East Hanover, NJ, USA), 10 ng/mL rHu interleukin-3, and 100 ng/mL rHu stem cell factor (SCF; R&D Systems, Minneapolis, MN, USA). Plated cells were incubated at 37  $^{\circ}$ C with 5% CO<sub>2</sub> for 10–14 days. Colonies were then counted, and pre-plerixafor dosing colonies were compared to post-plerixafor dosing colonies.

**Supplemental Figure S3.** Estimated apheresis CD34+ cell yield

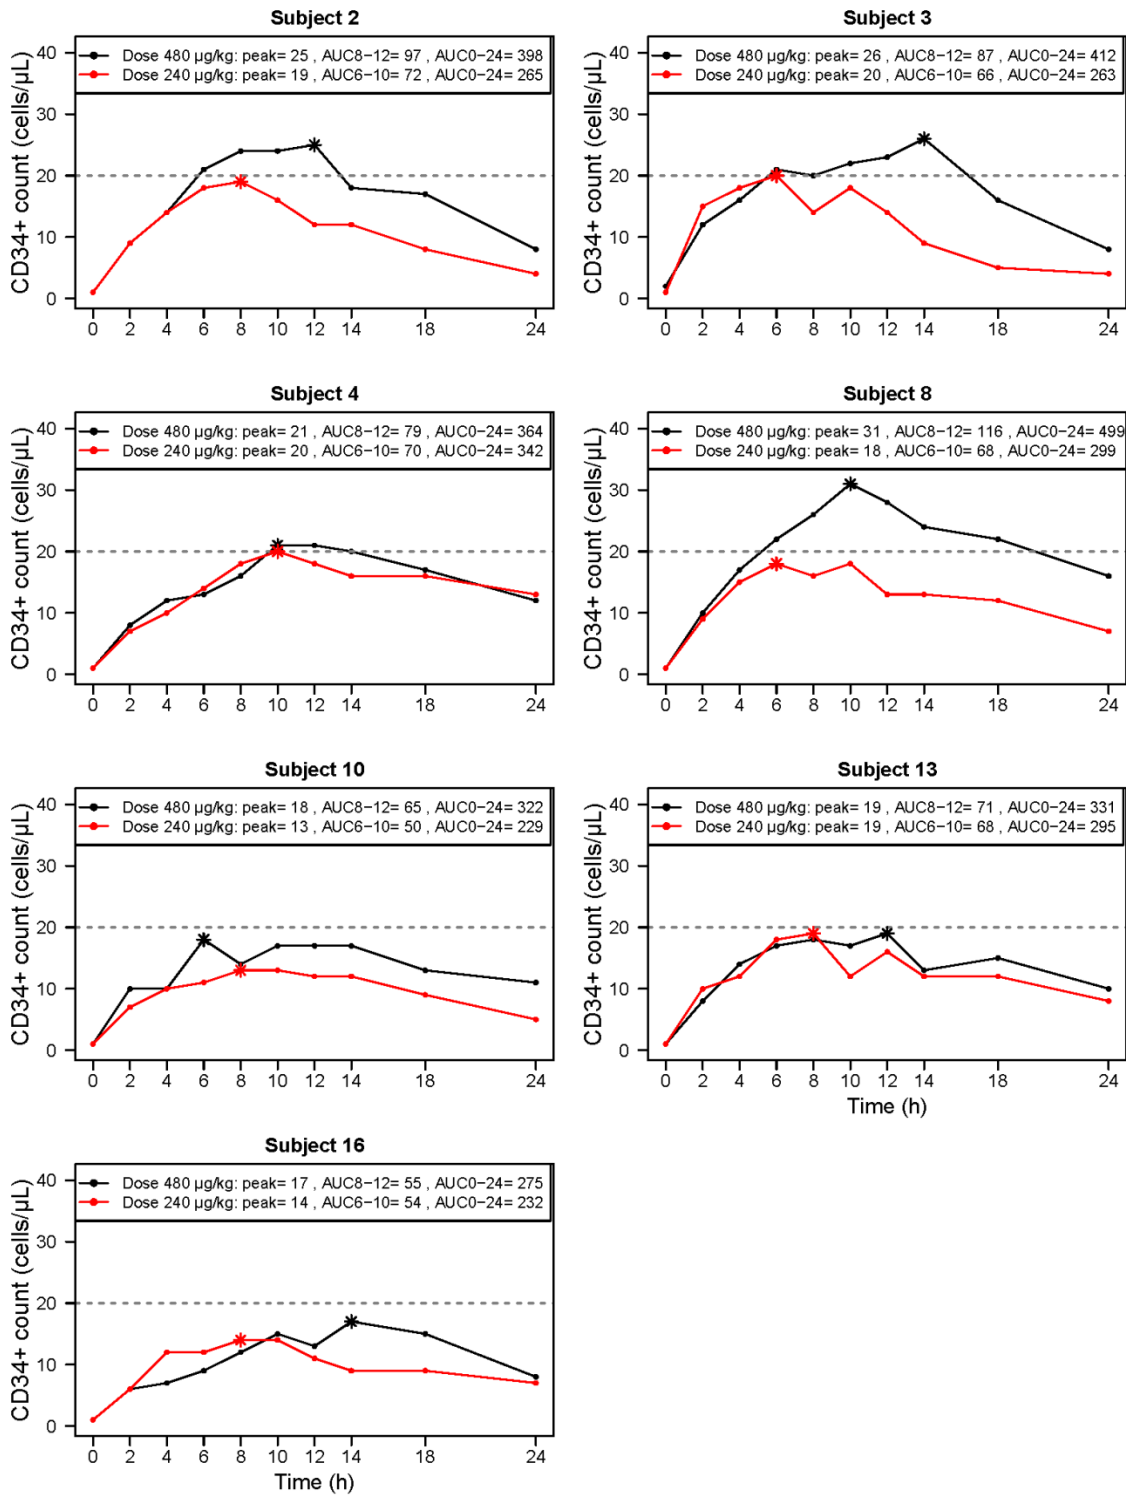

Supplemental Figure S1.

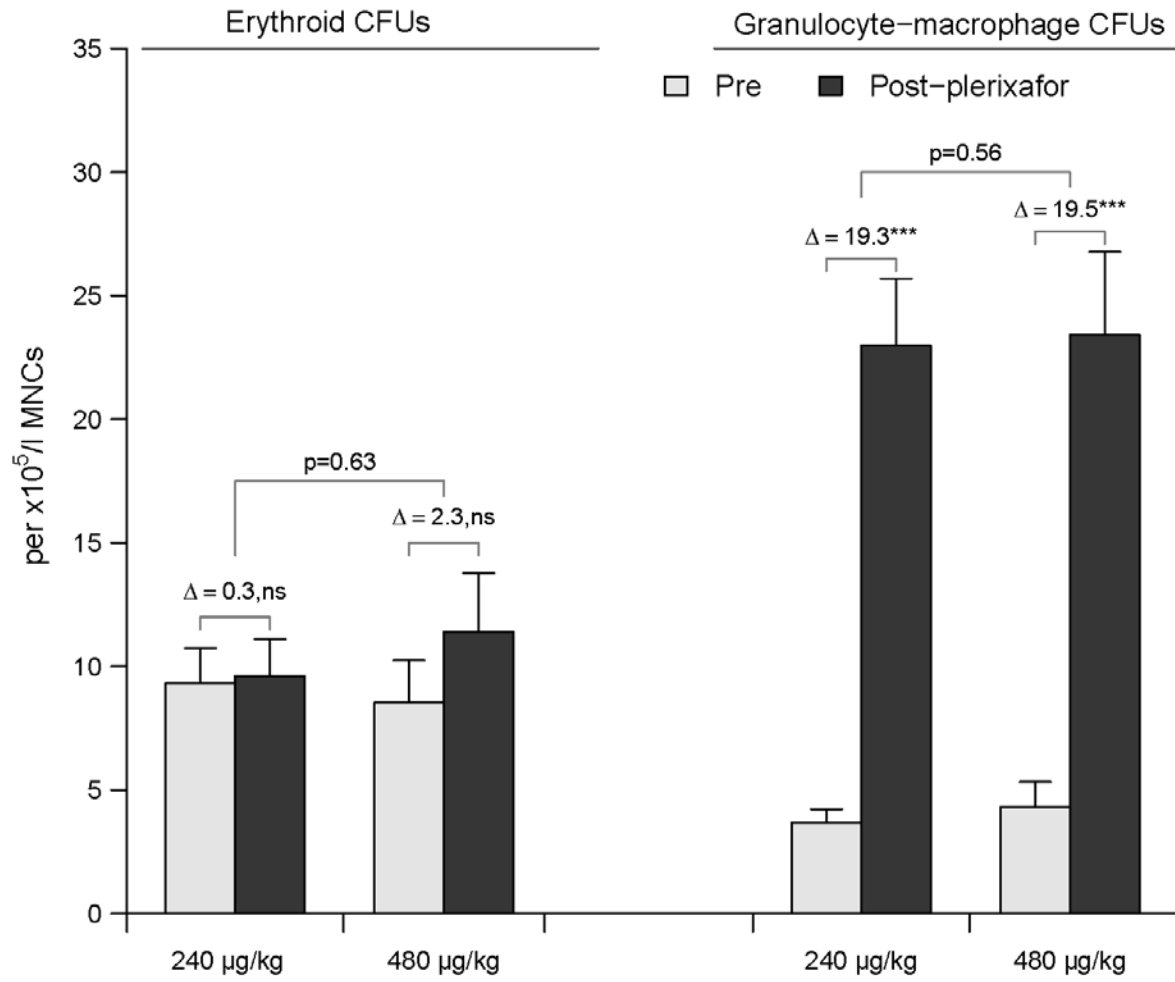

**Supplemental Figure S2.**

**A**

Estimated apheresis CD34+ cell yield (24 L)

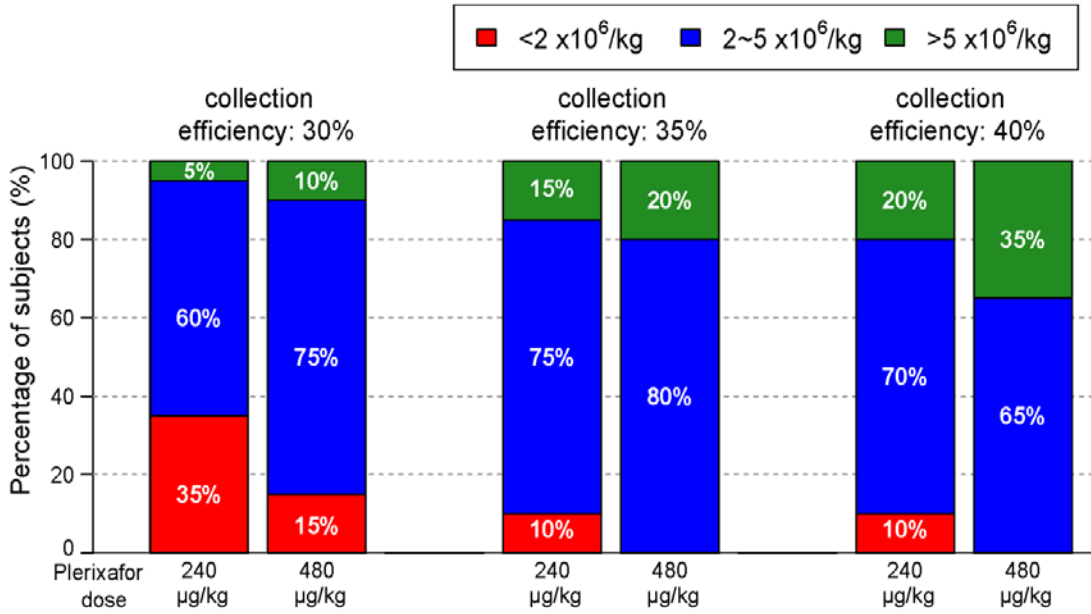**B**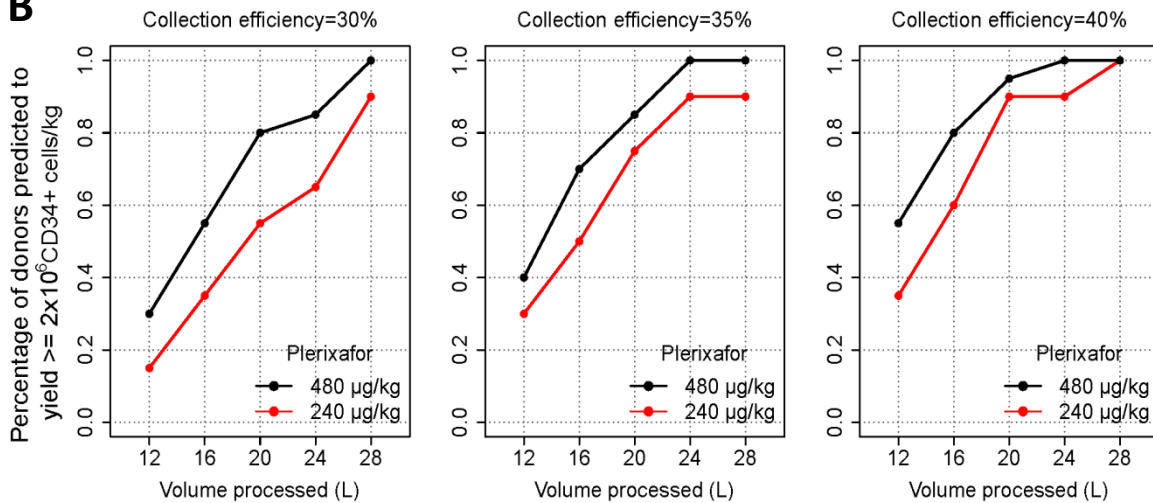

Supplemental Figure S3.
