# Supplementary material for: Effect of high-dose plerixafor on CD34+ cell mobilization in healthy stem cell donors: results of a randomized crossover trial
Source: PubMed Central journal article supplement — Haematologica. 2016 Oct 19;102(3):600–9. doi: 10.3324/haematol.2016.147132 (PMC5394957; doi:10.3324/haematol.2016.147132), 2017-03
Supplement: 2016_147132-Disclosures_and_Contributions.pdf [file 2016_147132-Disclosures_and_Contributions.pdf]

Haematologica  
HAEMATOL/2016/147132  
Version 3

Effect of high-dose plerixafor on CD34+ cells mobilization in healthy stem-cell donors: results of a randomized crossover trial

Jeremy Pantin, Enkhtsetseg Purev, Xin Tian, Lisa Cook, Theresa Donohue-Jerussi, Elena Cho, Robert Reger, Matthew Hsieh, Hanh Khuu, Gary Calandra, Nancy L. Geller, and Richard W. Childs

Disclosures: Gary Calandra worked for Sanofi but was not involved in the supply of study drug. The other authors have no conflict of interest to declare.

Contributions: J.P., R.C., G.C., and N.G. designed and wrote the protocol. J.P., T.D-J., L.C., E.C. and R.C. participated in subject screening, enrolment and patient care. R.R., M.H. and H.K. performed experiments. E.P., J.P., H.K., R.C., and X.T. analysed the data. J.P., E.P., X.T., M.H., H.K., and R.C. wrote the paper. No paid medical writer was involved in the preparation of this manuscript.
