# Supplementary material for: Effect of high-dose plerixafor on CD34+ cell mobilization in healthy stem cell donors: results of a randomized crossover trial
Source: PubMed Central journal article supplement — Haematologica. 2016 Oct 19;102(3):600–9. doi: 10.3324/haematol.2016.147132 (PMC5394957; doi:10.3324/haematol.2016.147132), 2017-03
Supplement: HAEMATOL-2016-147132v3-Pantin_01-01.pdf [file HAEMATOL-2016-147132v3-Pantin_01-01.pdf]

# High-dose plerixafor (480 µg/kg) can be safely administered in healthy donors and mobilizes greater numbers of CD34+ cells than conventional-dose plerixafor (240 µg/kg)

 Phase II, open-label, single-center, investigator-initiated, randomized, crossover trial  
 23 healthy stem-cell donors  
 National Institutes of Health (NIH) Clinical Center in Bethesda, MD, USA

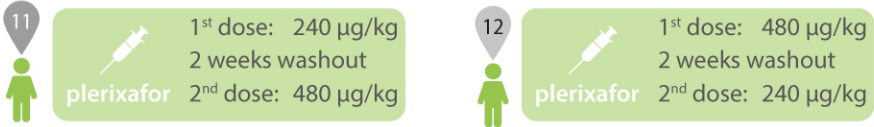

| Endpoint                                                   | 240 µg/kg group (n=11) | 480 µg/kg group (n=12) | p-value  |
|------------------------------------------------------------|------------------------|------------------------|----------|
| <b>Primary endpoint</b>                                    |                        |                        |          |
| peak CD34+ count in the blood (cells/µL)                   | 27.8                   | 32.2                   | p=0.0009 |
| <b>Secondary endpoints</b>                                 |                        |                        |          |
| CD34+ cell area under the curve over 24 hours (h cells/µL) | 446                    | 553                    | p<0.0001 |
| CD34+ count at 24 hours (cells/µL)                         | 10.7                   | 17.8                   | p<0.0001 |
| time to peak CD34+ (hours)                                 | 8.4                    | 10.5                   | p=0.012  |

7 subjects mobilized poorly (peak CD34+ ≤ 20 cells/µL) but after the 480 µg/kg dose

- 6/7 achieved higher peak CD34+ cell numbers
- 7/7 achieved higher CD34+ AUCs over 24 hours
